# Supplementary material for: Prediction of Cardiovascular Disease by the Framingham‐REGICOR Equation in the High‐Risk PREDIMED Cohort: Impact of the Mediterranean Diet Across Different Risk Strata
Source: PubMed Central journal article supplement — J Am Heart Assoc. 2017 Mar 13;6(3):e004803. doi: 10.1161/JAHA.116.004803 (PMC5524014; doi:10.1161/jaha.116.004803), 2017-03-13
Supplement: JAH3-6-e004803-s001.pdf [file JAH3-6-e004803-s001.pdf]

# **SUPPLEMENTAL MATERIAL**

**Table S1.** Concordance of estimated cardiovascular risk between Framingham-REGICOR and SCORE strategies in all population

| WHOLE SAMPLE (n=2984)* |                                 |                               |                                |
|------------------------|---------------------------------|-------------------------------|--------------------------------|
| SCORE                  | Framingham-REGICOR              |                               |                                |
|                        |                                 | Low/moderate risk<br>(n=2214) | High/very-high risk<br>(n=770) |
|                        | Low/moderate risk<br>(n=1059)   | 1081 (36.2)                   | 11 (0.4)                       |
|                        | High/very-high risk<br>(n=1859) | 1133 (38.0)                   | 759 (25.4)                     |
| MALES (n=1415)**       |                                 |                               |                                |
| SCORE                  | Framingham-REGICOR              |                               |                                |
|                        |                                 | Low/moderate risk<br>(n=932)  | High/very-high risk<br>(n=483) |
|                        | Low/moderate risk<br>(n=348)    | 347 (24.5)                    | 4 (0.3)                        |
|                        | High/very-high risk<br>(n=1049) | 585 (41.3)                    | 479 (33.9)                     |
| FEMALES (n=1569)***    |                                 |                               |                                |
| SCORE                  | Framingham-REGICOR              |                               |                                |
|                        |                                 | Low/moderate risk<br>(n=1282) | High/very-high risk<br>(n=287) |
|                        | Low/moderate risk<br>(n=711)    | 734 (46.8)                    | 7 (0.5)                        |
|                        | High/very-high risk<br>(n=810)  | 548 (34.9)                    | 280 (17.9)                     |

Data expressed as number (%) of individuals included in each category. \*Kappa coefficient=0.321.

\*\*Kappa coefficient=0.282. \*\*\* Kappa coefficient=0.317.

**Table S2.** Concordance of estimated cardiovascular risk between Framingham-REGICOR and SCORE strategies in non-diabetic population

| WHOLE SAMPLE (n=1589)* |                                |                               |                                |
|------------------------|--------------------------------|-------------------------------|--------------------------------|
| SCORE                  | Framingham-REGICOR             |                               |                                |
|                        |                                | Low/moderate risk<br>(n=1375) | High/very-high risk<br>(n=214) |
|                        | Low/moderate risk<br>(n=1059)  | 1049 (66.0)                   | 10 (0.6)                       |
|                        | High/very-high risk<br>(n=530) | 326 (20.5)                    | 204 (12.8)                     |
| MALES (n=693)**        |                                |                               |                                |
| SCORE                  | Framingham-REGICOR             |                               |                                |
|                        |                                | Low/moderate risk<br>(n=529)  | High/very-high risk<br>(n=164) |
|                        | Low/moderate risk<br>(n=348)   | 344 (49.6)                    | 4 (0.6)                        |
|                        | High/very-high risk<br>(n=345) | 185 (26.7)                    | 160 (23.1)                     |
| FEMALES (n=896)***     |                                |                               |                                |
| SCORE                  | Framingham-REGICOR             |                               |                                |
|                        |                                | Low/moderate risk<br>(n=846)  | High/very-high risk<br>(n=50)  |
|                        | Low/moderate risk<br>(n=711)   | 705 (78.7)                    | 6 (0.7)                        |
|                        | High/very-high risk<br>(n=185) | 141 (15.7)                    | 44 (4.9)                       |

Data expressed as number (%) of individuals included in each category. \*Kappa coefficient=0.441.  
 \*\*Kappa coefficient=0.453. \*\*\* Kappa coefficient=0.314.

**Table S3.** Main cardiovascular risk factors, medication use, and treatment goals by Framingham-REGICOR estimated cardiovascular risk category by sex.

| <b>WOMEN</b>                                   |                      |                           |                      |                           |        |
|------------------------------------------------|----------------------|---------------------------|----------------------|---------------------------|--------|
|                                                | Low<br>Risk (n=1236) | Moderate<br>Risk (n=1527) | High<br>Risk (n=554) | Very-high<br>Risk (n=58)  | p      |
| <b>LDLc</b>                                    |                      |                           |                      |                           |        |
| <b>LDLc (mg/dl)</b>                            | 130±33               | 134±34                    | 140±39               | 144±36                    | <0.001 |
| <b>Statin use [n, (%)]</b>                     | 593 (48.0)           | 649 (42.5)                | 222 (40.1)           | 19 (32.8)                 | 0.001  |
| <b>Meeting LDLc goals [n, (%)]</b>             | 647 (52.6)           | 451 (29.7)                | 69 (12.8)            | 1 (1.7)                   | <0.001 |
| <b>Blood pressure</b>                          |                      |                           |                      |                           |        |
| <b>SBP (mmHg)</b>                              | 137.8±15.9           | 146.7±14.7                | 167.2±20.9           | 161.2±14.7                | <0.001 |
| <b>DBP (mmHg)</b>                              | 79.8±9.1             | 82.8±9.2                  | 87.4±11.3            | 85.7±10.1                 | <0.001 |
| <b>Use of anti-hypertensive drugs [n, (%)]</b> | 944 (76.4)           | 1185 (77.7)               | 460 (83.0)           | 52 (89.7)                 | 0.002  |
| <b>BP &lt;140/90 [n, (%)]</b>                  | 703 (56.9)           | 436 (28.6)                | 30 (5.4)             | 0 (0)                     | <0.001 |
| <b>Smoking status</b>                          |                      |                           |                      |                           |        |
| <b>Current smokers [n, (%)]</b>                | 82 (6.6)             | 122 (8.0)                 | 39 (7.0)             | 13 (22.4)                 | <0.001 |
| <b>Anti-platelet drugs</b>                     |                      |                           |                      |                           |        |
| <b>Use of anti-platelet drugs [n, (%)]</b>     | 171 (13.8)           | 281 (18.4)                | 112 (20.2)           | 9 (15.5)                  | 0.002  |
| <b>MEN</b>                                     |                      |                           |                      |                           |        |
|                                                | Low<br>Risk (n=263)  | Moderate<br>Risk (n=1129) | High<br>Risk (n=782) | Very-high<br>Risk (n=417) | P      |
| <b>LDLc</b>                                    |                      |                           |                      |                           |        |
| <b>LDLc (mg/dl)</b>                            | 108±33               | 123±31                    | 129±32               | 142±33                    | <0.001 |
| <b>Statin use [n, (%)]</b>                     | 116 (44.1)           | 468 (41.5)                | 255 (32.6)           | 96 (23.0)                 | <0.001 |
| <b>LDLc meeting goals [n, (%)]</b>             | 194 (74.6)           | 454 (40.5)                | 134 (17.4)           | 6 (1.5)                   | <0.001 |
| <b>Blood pressure</b>                          |                      |                           |                      |                           |        |
| <b>SBP (mmHg)</b>                              | 136.1±14.7           | 145.0±15.2                | 156.7±19.0           | 157.8±18.0                | <0.001 |
| <b>DBP (mmHg)</b>                              | 80.8±9.4             | 83.5±9.3                  | 86.3±11.4            | 85.5±9.5                  | <0.001 |
| <b>Use of anti-hypertensive drugs [n, (%)]</b> | 194 (73.8)           | 793 (70.2)                | 563 (72.0)           | 300 (71.9)                | 0.646  |
| <b>BP &lt;140/90 [n, (%)]</b>                  | 164 (62.4)           | 402 (35.6)                | 131 (16.8)           | 48 (11.5)                 | <0.001 |
| <b>Smoking status</b>                          |                      |                           |                      |                           |        |
| <b>Current smokers [n, (%)]</b>                | 23 (8.8)             | 236 (20.9)                | 287 (36.7)           | 267 (64.0)                | <0.001 |
| <b>Anti-platelet drugs</b>                     |                      |                           |                      |                           |        |
| <b>Use of anti-platelet drugs [n, (%)]</b>     | 57 (21.7)            | 223 (19.8)                | 159 (20.3)           | 102 (24.5)                | 0.226  |

Data expressed as mean±SD or number (%). SBP, systolic blood pressure; DBP, diastolic blood pressure. LDLc goals according to estimated CVR were defined as: <130 mg/dL for low, <115 mg/dL moderate, <100 mg/dL high, and < 70 mg/dL very high risk, respectively.

**Table S4.** Distribution of other classical and non-classical cardiovascular risk factors by estimated Framingham-REGICOR risk category by sex.

| WOMEN                                        |                       |                           |                         |                           |        |
|----------------------------------------------|-----------------------|---------------------------|-------------------------|---------------------------|--------|
|                                              | Low<br>Risk (n=1236)  | Moderate<br>Risk (n=1527) | High<br>Risk (n=554)    | Very-high<br>Risk (n=58)  | p      |
| Age (years)                                  | 66.8±4.8              | 65.7±4.4                  | 66.1±4.3                | 64.2±3.8                  | <0.001 |
| Total cholesterol<br>(mg/dL)                 | 213±35                | 211±35                    | 218±42                  | 219±36                    | 0.056  |
| HDLc (mg/dL)                                 | 61±11                 | 51±9                      | 48±10                   | 38±7                      | <0.001 |
| Diabetes [n, (%)]                            | 174 (14.1)            | 824 (54.0)                | 427 (77.1)              | 58 (100)                  | <0.001 |
| Microalbuminuria<br>≥ 30 mg/g [n, (%)] *     | 30 (8.3)<br>n=363     | 49 (9.1)<br>n=538         | 42 (19.9)<br>n=211      | 3 (15.0)<br>n=20          | <0.001 |
| eGFR (CKD-EPI,<br>ml/min)**                  | 74.5±15.7             | 76.3±16.1                 | 75.5±16.4               | 81.7±12.9                 | 0.002  |
| BMI (kg/m <sup>2</sup> )                     | 29.8±3.8              | 30.8±4.2                  | 31.3±4.3                | 32.8±4.7                  | <0.001 |
| Waist (cm)                                   | 96.2±10.5             | 98.9±10.4                 | 101.0±11.0              | 106.8±11.3                | <0.001 |
| Obesity [n, (%)]                             | 565 (45.7)            | 851 (55.7)                | 329 (59.4)              | 41 (70.7)                 | <0.001 |
| Central obesity***                           | 937 (76.7)            | 1279 (85.2)               | 483 (89.3)              | 53 (94.6)                 | <0.001 |
| Triglycerides<br>(mg/dL)                     | 99.4 (77.5-<br>130.4) | 121.3 (95.5-<br>157.4)    | 140.4 (106.0-<br>186.2) | 194.1 (145.4-<br>269.3)   | <0.001 |
| Atherogenic<br>dyslipidemia<br>[n, (%)] **** | 25 (2.0)              | 171 (11.2)                | 121 (22.2)              | 37 (63.8)                 | <0.001 |
| Physical activity<br>(METS)                  | 185.7±177.4           | 172.8±165.6               | 167.9±150.3             | 132.3±194.0               | 0.003  |
| Adherence to Med.<br>diet (points)           | 8.8±1.9               | 8.6±1.9                   | 8.5±1.8                 | 8.4±1.8                   | 0.006  |
| MedDiet group [n,<br>(%)]                    | 824 (66.7)            | 1032 (67.6)               | 366 (66.1)              | 40 (69.0)                 | 0.893  |
| Education level (%)                          |                       |                           |                         |                           |        |
| No studies or<br>primary                     | 1029 (83.3)           | 1304 (85.4)               | 470 (84.8)              | 47 (81.0)                 | 0.280  |
| Secondary                                    | 141 (11.4)            | 163 (10.7)                | 63 (11.4)               | 10 (17.2)                 |        |
| University                                   | 66 (5.4)              | 60 (3.9)                  | 21 (3.8)                | 1 (1.7)                   |        |
| MEN                                          |                       |                           |                         |                           |        |
|                                              | Low<br>Risk (n=263)   | Moderate<br>Risk (n=1129) | High<br>Risk (n=782)    | Very-high<br>Risk (n=417) | p      |
| Age (years)                                  | 61.5±4.8              | 63.5±5.1                  | 65.8±5.0                | 67.8±4.8                  | <0.001 |
| Total cholesterol<br>(mg/dL)                 | 181±36                | 196±34                    | 202±32                  | 217±35                    | <0.001 |
| HDLc (mg/dL)                                 | 52±12                 | 48±10                     | 46±9                    | 43±8                      | <0.001 |
| Diabetes [n, (%)]                            | 88 (33.5)             | 498 (44.1)                | 461 (59.0)              | 336 (80.6)                | <0.001 |
| Age (years)                                  | 61.5±4.8              | 63.5±5.1                  | 65.8±5.0                | 67.8±4.8                  | <0.001 |
| Total cholesterol<br>(mg/dL)                 | 181±36                | 196±34                    | 202±32                  | 217±35                    | <0.001 |
| HDLc (mg/dL)                                 | 52±12                 | 48±10                     | 46±9                    | 43±8                      | <0.001 |
| Diabetes [n, (%)]                            | 88 (33.5)             | 498 (44.1)                | 461 (59.0)              | 336 (80.6)                | <0.001 |
| Microalbuminuria<br>≥ 30 mg/g [n, (%)]†      | 12 (13.8)<br>n=87     | 66 (17.7)<br>n=374        | 74 (23.7)<br>n=312      | 50 (29.4)<br>n=170        | 0.004  |
| eGFR (CKD-EPI,<br>ml/min) ††                 | 81.7±14.5             | 79.1±15.3                 | 78.6±15.5               | 75.6±14.2                 | <0.001 |
| BMI (kg/m <sup>2</sup> )                     | 28.8±3.4              | 29.3±3.2                  | 29.6±3.3                | 29.6±3.7                  | 0.002  |
| Waist (cm)                                   | 101.2±9.5             | 103.0±9.1                 | 103.9±9.3               | 103.7±9.6                 | <0.001 |
| Obesity [n, (%)]                             | 85 (32.3)             | 451 (40.0)                | 340 (43.5)              | 178 (42.7)                | 0.011  |
| Central obesity†††                           | 116 (44.6)            | 536 (48.3)                | 414 (53.8)              | 226 (55.5)                | 0.004  |

|                                                         |                   |                    |                    |                     |        |
|---------------------------------------------------------|-------------------|--------------------|--------------------|---------------------|--------|
| <b>Triglycerides (mg/dL)</b>                            | 89.7 (70.0-124.0) | 111.2 (84.6-153.3) | 123.8 (92.5-163.4) | 147.0 (109.4-211.4) | <0.001 |
| <b>Atherogenic dyslipidemia [n, (%)]<sup>††††</sup></b> | 8 (3.0)           | 106 (9.4)          | 80 (10.4)          | 96 (23.0)           | <0.001 |
| <b>Physical activity (METS)</b>                         | 324.1±311.8       | 318.0±295.8        | 328.5±324.1        | 291.2±268.3         | 0.319  |
| <b>Adherence to Med. diet (points)</b>                  | 8.9±2.0           | 8.8±2.0            | 8.7±1.9            | 8.8±2.1             | 0.747  |
| <b>MeDiet group [n, (%)]</b>                            | 185 (70.3)        | 804 (71.2)         | 533 (68.2)         | 278 (66.7)          | 0.273  |
| <b>Education level (%)</b>                              |                   |                    |                    |                     |        |
| <b>No studies or primary</b>                            | 163 (62.0)        | 714 (63.2)         | 528 (67.5)         | 296 (71.0)          | 0.088  |
| <b>Secondary</b>                                        | 66 (25.1)         | 270 (23.9)         | 165 (21.1)         | 80 (19.2)           |        |
| <b>University</b>                                       | 34 (12.9)         | 145 (12.8)         | 89 (11.4)          | 41 (9.8)            |        |

Data expressed as median (interquartile range) or number (%) unless indicated otherwise.

Shaded rows are the variables considered to estimate the cardiovascular risk on REGICOR.

\* Information available in n=363/538/211/20 in low/moderate/high/very high-risk, respectively.

\*\* Estimated glomerular filtration rate based on CKD-EPI creatinine equation. Information available in n=913/1111/389/42.

\*\*\* Central obesity defined as waist >88 cm. Missing information in n=56.

\*\*\*\* Atherogenic dyslipidemia was defined as HDLc < 45 mg/dl and triglycerides > 150 mg/dl. Missing information in n=18.

† Information available in n=87/374/312/170 in low/moderate/high/very high-risk, respectively.

†† Estimated glomerular filtration rate based on CKD-EPI creatinine equation. Information available in n=192/785/578/306.

††† Central obesity defined as waist >102 cm. Missing information in n=44.

†††† Atherogenic dyslipidemia was defined as HDLc < 40 mg/dl and triglycerides > 150 mg/dl. Missing information in n=10.

## Supplemental Figures

**Figure S1.** Flow-chart of PREDIMED participants using European Guidelines on cardiovascular disease prevention in clinical practice-SCORE strategy.

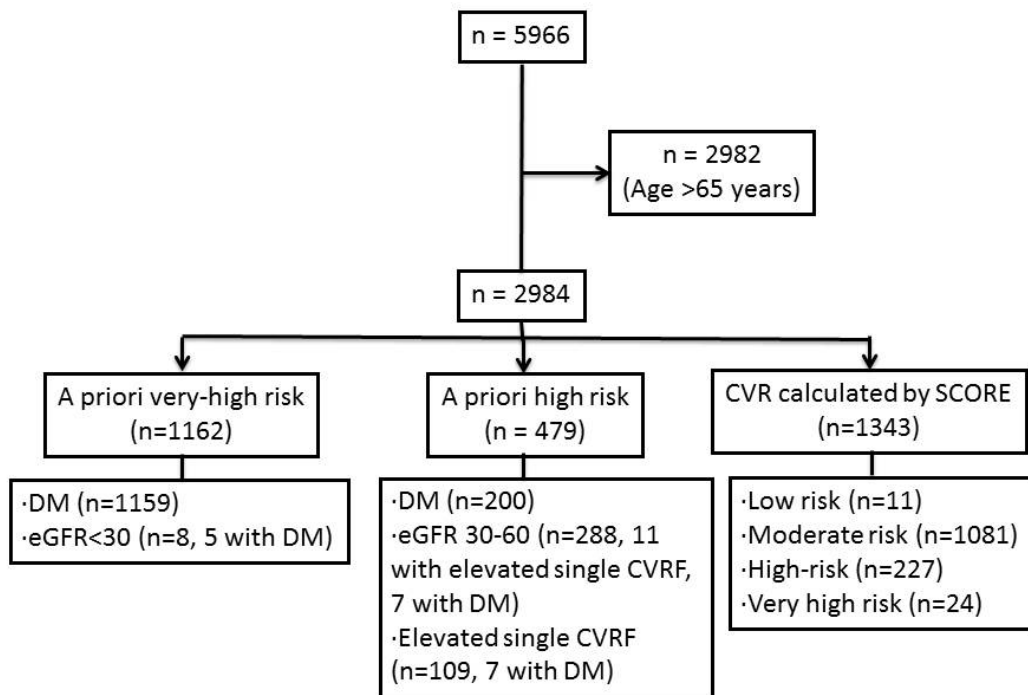

CVR, cardiovascular risk; CVRF, cardiovascular risk factors; DM, diabetes mellitus; eGFR, estimated glomerular filtration rate.

**Figure S2.** Cardiovascular risk estimated by the European Guidelines on cardiovascular disease prevention in clinical practice-SCORE strategy in population aged 55 to 65 years of total cohort (A; n=2,982), women (B; n=1,569) and men (C; n=1,415). Data are shown as n and percentage.

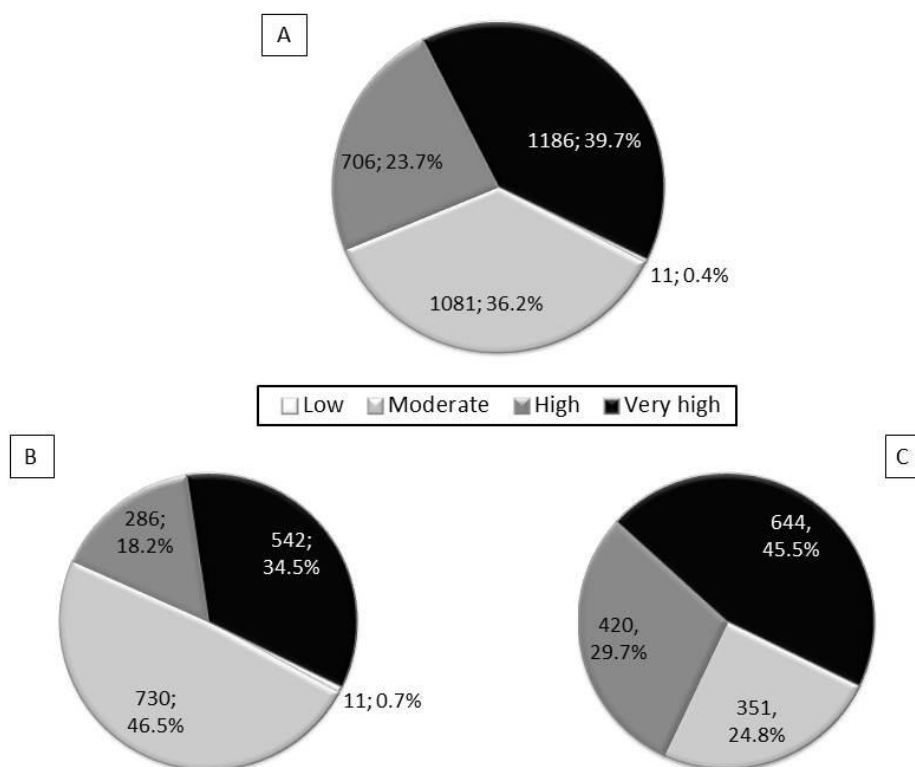

**Figure S3.** Percentage of cardiovascular events across estimated cardiovascular risk by Framingham-REGICOR strategy in total cohort (A), women (B) and men (C).

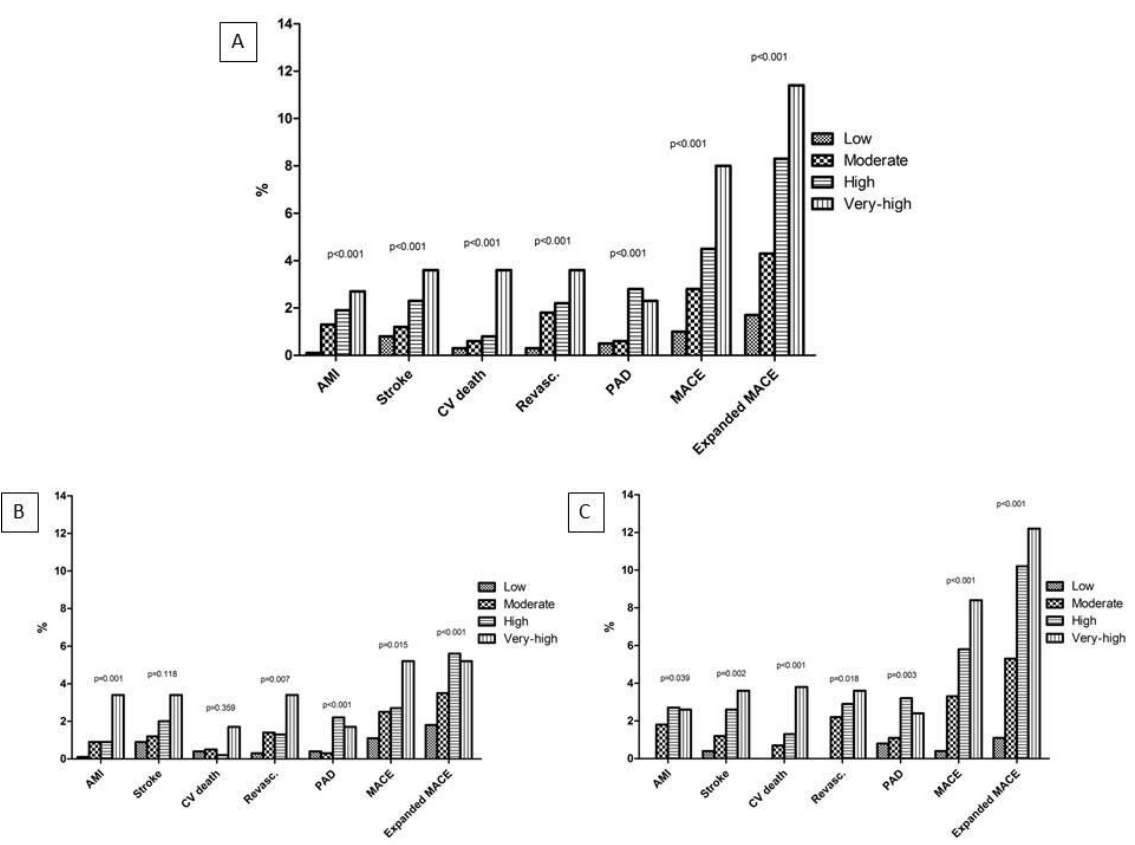

p for the difference in events across risk categories.

AMI: acute miocardial infarction; CV: cardiovascular, Revasc.: Revascularization;  
 PAD: peropheral artery disease.
